# Supplementary material
Source: MDPI journal article supplement (https://www.mdpi.com/2079-9284/4/2/17)
Supplement: s1 [file s1]

**Table S1.** Analysis of the lifestyle of the pilot study subjects.

| <b>Lifestyle</b>        | <b>%</b> |
|-------------------------|----------|
| Sun beds                | 8        |
| Exfoliation             | 71       |
| Exposure to sun         | 60       |
| Use cream with SPF      | 94       |
| Medication /supplements | 35       |
| Use cleansing products  | 95       |

**Table S2.** Self-Perception Questionnaire responses of the pilot study subjects after one application of the test product.

| <b>My skin is:</b>     | <b>Strongly agree<br/>%</b> | <b>Agree<br/>%</b> | <b>Disagree<br/>%</b> | <b>Strongly disagree<br/>%</b> | <b>Not sure<br/>%</b> |
|------------------------|-----------------------------|--------------------|-----------------------|--------------------------------|-----------------------|
| More Hydrated          | 46.8                        | 50.0               | 1.6                   | 0.0                            | 1.6                   |
| More supple            | 30.6                        | 50.0               | 8.1                   | 0.0                            | 11.3                  |
| Smoother               | 29.0                        | 56.5               | 4.8                   | 0.0                            | 9.7                   |
| Healthier              | 14.5                        | 62.9               | 9.7                   | 0.0                            | 12.9                  |
| More Youthful          | 12.9                        | 41.9               | 17.7                  | 1.6                            | 25.8                  |
| More radiant           | 25.8                        | 45.2               | 9.7                   | 1.6                            | 17.7                  |
| Softer                 | 32.3                        | 51.6               | 9.7                   | 0.0                            | 6.5                   |
| Firmer                 | 16.1                        | 38.7               | 16.1                  | 0.0                            | 29.0                  |
| Less damaged           | 3.2                         | 22.6               | 30.6                  | 3.2                            | 40.3                  |
| Less fine lines        | 3.2                         | 19.4               | 40.3                  | 3.2                            | 33.9                  |
| Less wrinkles          | 1.6                         | 8.1                | 41.9                  | 8.1                            | 40.3                  |
| Less pigmentation      | 0.0                         | 9.7                | 54.8                  | 11.3                           | 24.2                  |
| Less dark eyes circles | 1.6                         | 16.1               | 50.0                  | 9.7                            | 22.6                  |
| Smaller pores          | 4.8                         | 24.2               | 32.3                  | 12.9                           | 25.8                  |

**Table S3.** Raw data for Corneometer® assessment.

| SUBJECT | T0        |         | T1        |         | T2        |         |
|---------|-----------|---------|-----------|---------|-----------|---------|
|         | Untreated | Treated | Untreated | Treated | Untreated | Treated |
| 1       | 44        | 43      | 43        | 67      | 44        | 70      |
| 2       | 46        | 46      | 45        | 64      | 43        | 66      |
| 3       | 35        | 36      | 36        | 72      | 35        | 73      |
| 4       | 36        | 35      | 33        | 68      | 34        | 70      |
| 5       | 44        | 42      | 45        | 74      | 43        | 75      |
| 6       | 37        | 38      | 38        | 70      | 37        | 72      |
| 7       | 32        | 32      | 31        | 65      | 32        | 69      |
| 8       | 31        | 30      | 33        | 63      | 36        | 65      |
| 9       | 48        | 46      | 49        | 74      | 50        | 75      |
| 10      | 40        | 41      | 44        | 76      | 42        | 78      |
| 11      | 42        | 39      | 43        | 72      | 41        | 74      |
| 12      | 45        | 44      | 46        | 63      | 45        | 66      |
| 13      | 30        | 33      | 32        | 74      | 33        | 76      |
| 14      | 35        | 36      | 36        | 66      | 38        | 69      |
| 15      | 31        | 32      | 30        | 65      | 31        | 66      |
| 16      | 43        | 40      | 41        | 69      | 43        | 72      |
| 17      | 45        | 47      | 44        | 61      | 43        | 63      |
| 18      | 36        | 35      | 35        | 76      | 34        | 78      |
| 19      | 44        | 45      | 43        | 73      | 42        | 75      |
| 20      | 47        | 49      | 46        | 65      | 45        | 67      |
| 21      | 44        | 43      | 47        | 63      | 49        | 65      |
| 22      | 47        | 35      | 45        | 72      | D/O*      | D/O*    |
| 23      | 30        | 32      | 33        | 76      | 32        | 78      |
| 24      | 46        | 48      | 44        | 78      | 42        | 78      |
| 25      | 45        | 44      | 43        | 64      | 41        | 65      |
| 26      | 35        | 32      | 36        | 63      | 35        | 67      |
| 27      | 29        | 30      | 32        | 70      | 33        | 73      |
| 28      | 40        | 41      | 39        | 67      | 42        | 69      |
| 29      | 47        | 45      | 45        | 75      | 44        | 77      |
| 30      | 44        | 47      | 46        | 72      | 45        | 74      |
| 31      | 47        | 46      | 48        | 67      | 51        | 72      |

\*D/O: Drop Off

**Table S4.** Raw data for Chromameter assessment.

| SUBJECT | T0        |         | T1        |         | T2        |         |
|---------|-----------|---------|-----------|---------|-----------|---------|
|         | Untreated | Treated | Untreated | Treated | Untreated | Treated |
| 1       | 51        | 53      | 51        | 58      | 50        | 63      |
| 2       | 56        | 55      | 56        | 60      | 54        | 67      |
| 3       | 55        | 57      | 55        | 63      | 52        | 70      |
| 4       | 53        | 52      | 52        | 57      | 51        | 65      |
| 5       | 59        | 58      | 59        | 65      | 57        | 71      |
| 6       | 54        | 56      | 54        | 60      | 50        | 66      |
| 7       | 52        | 51      | 53        | 57      | 52        | 60      |
| 8       | 62        | 59      | 62        | 63      | 58        | 68      |
| 9       | 53        | 54      | 54        | 56      | 52        | 62      |
| 10      | 58        | 57      | 58        | 60      | 55        | 64      |
| 11      | 59        | 60      | 59        | 65      | 57        | 68      |
| 12      | 54        | 52      | 54        | 59      | 53        | 64      |
| 13      | 50        | 49      | 50        | 54      | 48        | 59      |
| 14      | 53        | 55      | 54        | 58      | 52        | 62      |
| 15      | 57        | 58      | 57        | 63      | 56        | 65      |
| 16      | 52        | 51      | 52        | 54      | 50        | 61      |
| 17      | 47        | 46      | 46        | 52      | 45        | 58      |
| 18      | 63        | 61      | 63        | 65      | 57        | 68      |
| 19      | 49        | 48      | 48        | 52      | 45        | 56      |
| 20      | 44        | 43      | 44        | 49      | 43        | 54      |
| 21      | 43        | 44      | 43        | 47      | 41        | 51      |
| 22      | 45        | 47      | 44        | 51      | D/O*      | D/O*    |
| 23      | 52        | 53      | 53        | 58      | 50        | 62      |
| 24      | 43        | 42      | 43        | 48      | 42        | 54      |
| 25      | 61        | 60      | 61        | 64      | 60        | 70      |
| 26      | 55        | 56      | 56        | 60      | 53        | 65      |
| 27      | 53        | 51      | 53        | 55      | 50        | 57      |
| 28      | 59        | 58      | 60        | 64      | 58        | 69      |
| 29      | 52        | 50      | 52        | 56      | 51        | 58      |
| 30      | 45        | 46      | 44        | 51      | 43        | 54      |
| 31      | 44        | 45      | 45        | 48      | 47        | 53      |

\*D/O: Drop Off

**Table S5.** Raw data for Visual assessment.

| SUBJECT | T0        |         | T1        |         | T2        |         |
|---------|-----------|---------|-----------|---------|-----------|---------|
|         | Untreated | Treated | Untreated | Treated | Untreated | Treated |
| 1       | 3         | 3       | 3         | 2       | 3         | 2       |
| 2       | 4         | 4       | 4         | 3       | 3         | 2       |
| 3       | 2         | 2       | 2         | 1       | 2         | 1       |
| 4       | 4         | 4       | 4         | 3       | 4         | 3       |
| 5       | 4         | 4       | 4         | 3       | 4         | 3       |
| 6       | 3         | 3       | 3         | 2       | 3         | 2       |
| 7       | 3         | 3       | 3         | 2       | 3         | 2       |
| 8       | 3         | 3       | 3         | 2       | 3         | 2       |
| 9       | 3         | 3       | 3         | 2       | 3         | 1       |
| 10      | 3         | 3       | 3         | 2       | 3         | 2       |
| 11      | 3         | 3       | 3         | 2       | 3         | 2       |
| 12      | 3         | 3       | 3         | 2       | 3         | 2       |
| 13      | 3         | 3       | 3         | 2       | 3         | 2       |
| 14      | 4         | 4       | 4         | 3       | 3         | 3       |
| 15      | 4         | 4       | 4         | 4       | 4         | 3       |
| 16      | 3         | 3       | 3         | 2       | 3         | 2       |
| 17      | 4         | 4       | 4         | 3       | 4         | 3       |
| 18      | 4         | 4       | 4         | 3       | 4         | 3       |
| 19      | 3         | 3       | 3         | 3       | 3         | 2       |
| 20      | 3         | 3       | 3         | 2       | 3         | 2       |
| 21      | 3         | 3       | 3         | 2       | 3         | 2       |
| 22      | 4         | 4       | 4         | 4       | D/O*      | D/O*    |
| 23      | 4         | 4       | 4         | 3       | 4         | 2       |
| 24      | 3         | 3       | 3         | 2       | 3         | 2       |
| 25      | 2         | 2       | 2         | 2       | 2         | 2       |
| 26      | 2         | 2       | 2         | 1       | 2         | 2       |
| 27      | 2         | 2       | 2         | 2       | 2         | 2       |
| 28      | 2         | 2       | 2         | 2       | 2         | 1       |
| 29      | 4         | 4       | 4         | 3       | 4         | 3       |
| 30      | 3         | 3       | 3         | 2       | 3         | 2       |
| 31      | 2         | 2       | 2         | 2       | 2         | 1       |

\*D/O: Drop Off

**Table S6.** Self-Perception Questionnaire responses of the clinical trial subjects after one application (T1) and 4 applications (T2) of the test product.

| Questions                                                                   | Top 2 Responses (“strongly agree” and “agree”) |        |
|-----------------------------------------------------------------------------|------------------------------------------------|--------|
|                                                                             | T1                                             | T2     |
| After using the product my skin looked less tired                           | 96.7%                                          | 100.0% |
| After using the product my skin tone was more even                          | 93.5%                                          | 100.0% |
| After using the product my skin looked brighter                             | 93.5%                                          | 100.0% |
| After using the product I had younger looking skin                          | 93.5%                                          | 96.7%  |
| After using the product I had a reduction in fine lines and wrinkles        | 51.5%                                          | 80.6%  |
| After using the product my skin looked healthier                            | 100.0%                                         | 100.0% |
| After using the product my skin looked more radiant                         | 93.5%                                          | 100.0% |
| After using the product I had a reduction in pigmentation spots             | 25.8%                                          | 74.1%  |
| My skin felt fresher after using the product (cooling sensation)            | 87.0%                                          | 100.0% |
| After using the product my skin felt plumper                                | 90.3%                                          | 96.6%  |
| After using the product my skin felt more moisturised                       | 100.0%                                         | 100.0% |
| I was more confident in my skin after using the product                     | 96.7%                                          | 100.0% |
| The product had an immediate cooling effect                                 | 96.6%                                          | 100.0% |
| I would include the product into my normal beauty routine                   | 87.0%                                          | 96.7%  |
| I would recommend the product to others                                     | 87.0%                                          | 96.7%  |
| I would choose the product over other similar products on the market        | 83.8%                                          | 96.7%  |
| I would use the product for perfect skin before a big event                 | 90.3%                                          | 100.0% |
| The product was easy to apply                                               | 54.8%                                          | 100.0% |
| The product was perfect for 'me time'                                       | 93.5%                                          | 100.0% |
| The product felt like it fitted like a second skin when applied on the face | 51.6%                                          | 100.0% |
